# Supplementary material for: Environmental pH signals the release of monosaccharides from cell wall in coral symbiotic alga
Source: eLife. 2023 Aug 18;12:e80628. doi: 10.7554/eLife.80628 (PMC10438907; doi:10.7554/eLife.80628)
Supplement: Figure 3—source data 3. [file elife-80628-fig3-data3.xlsx]

## Sheet: TableS2_230216
isoformID	HMMER	Hotpep	DIAMOND	Signalp	#ofTools	annotation	gene_id	a.value	m.value	p.value	q.value	rank	control1_TPM	control2_TPM	control3_TPM	control4_TPM	normal2_TPM	normal3_TPM	normal4_TPM	normal5_TPM	lowpH1_TPM	lowpH3_TPM	lowpH4_TPM	lowpH5_TPM
TRINITY_DN40554_c2_g2_i4	GH7(20-458)	GH7+CBM1	GH7	Y(1-19)	3	OLQ05972.1 putative 1,4-beta-D-glucan cellobiohydrolase B [Symbiodinium microadriaticum]	TRINITY_DN40554_c2_g2_i4	9.90676	0.845318	5.12e-09	4.77e-06	256	5.13	6.57	5.53	5.04	7.13	6.18	4.64	6.88	9.87	8.57	9.09	9.65
TRINITY_DN48195_c0_g1_i1	GH55(331-567)	GH55	N	N	2	WP_075004749.1 discoidin domain-containing protein [Stigmatella aurantiaca] >SEK41433.1 Chitodextrinase [Stigmatella aurantiaca]	TRINITY_DN48195_c0_g1_i1	9.36429	0.836443	5.34e-08	3.45e-05	370	3.77	4.1	4.31	3.26	4.31	4.94	4.04	5.11	6.74	6.46	6.19	6.09
TRINITY_DN40554_c2_g2_i1	GH7(20-452)	GH7+CBM1	GH7	Y(1-19)	3	OLQ05972.1 putative 1,4-beta-D-glucan cellobiohydrolase B [Symbiodinium microadriaticum]	TRINITY_DN40554_c2_g2_i1	10.0608	0.605212	1.15e-06	0.000457502	602	8.34	7.19	7.38	6.61	8.71	8.35	5.64	9.3	11.72	9.61	9.74	10.43
TRINITY_DN34315_c0_g2_i1	GT1(265-447)	GT1	N	N	2	OLP95969.1 Sterol 3-beta-glucosyltransferase UGT80B1 [Symbiodinium microadriaticum]	TRINITY_DN34315_c0_g2_i1	7.22292	1.14962	2.03e-06	0.000735239	659	0.97	0.88	1.06	0.88	0.98	0.96	0.7	0.9	2.41	1.72	2.03	1.64
TRINITY_DN37747_c2_g1_i1	CE13(30-370)	CE13	N	N	2	KAA0155976.1 hypothetical protein FNF29_01395 [Cafeteria roenbergensis]	TRINITY_DN37747_c2_g1_i1	9.06407	0.624093	2.34e-05	0.0053832	1041	6.05	5.79	6.34	5.12	6.95	6.99	4.28	7.3	8.39	7.37	9.04	8.44
TRINITY_DN21426_c0_g1_i1	CBM9(53-235)	CBM9	N	N	2	OLQ07034.1 Peptidyl-prolyl cis-trans isomerase A [Symbiodinium microadriaticum]	TRINITY_DN21426_c0_g1_i1	9.59126	0.452875	0.000690708	0.0737435	2239	8.94	8.47	9.55	7.9	10.29	11.16	8.02	11.12	11.33	10.55	11.49	10.74
TRINITY_DN57980_c0_g1_i1	GH20(170-522)	GH20	N	N	2	OLQ15550.1 Beta-hexosaminidase [Symbiodinium microadriaticum]	TRINITY_DN57980_c0_g1_i1	9.70608	0.405936	0.00322021	0.217391	3541	7.45	7.47	8.06	6.77	8.8	8.64	6.66	8.04	10.12	8.96	8.81	8.59
TRINITY_DN38536_c3_g9_i1	AA6(59-255)+AA6(267-459)	AA6	N	N	2	OLQ07621.1 Minor allergen Alt a 7 [Symbiodinium microadriaticum]	TRINITY_DN38536_c3_g9_i1	9.34228	0.410341	0.0047678	0.282111	4040	5.83	6.51	6.46	5.83	6.53	7.24	4.99	6.53	8.51	6.78	7.45	7.67
TRINITY_DN38536_c3_g3_i1	AA6(1-122)+AA6(134-329)	AA6	N	N	2	OLQ07621.1 Minor allergen Alt a 7 [Symbiodinium microadriaticum]	TRINITY_DN38536_c3_g3_i1	11.575	0.380415	0.00957524	0.436569	5243	33.44	41.32	41.22	32.01	37.01	45	28.69	40.59	51.86	35.95	46.91	44.61
TRINITY_DN37663_c6_g3_i1	GH18(52-376)	GH18	N	N	2	OLQ03390.1 Chitotriosidase-1 [Symbiodinium microadriaticum]	TRINITY_DN37663_c6_g3_i1	8.85664	-0.480103	0.010015	0.447773	5346	4.39	3.6	4.17	3.34	4.27	3.79	1.54	5.01	2.66	1.79	2.84	3.04
TRINITY_DN32841_c0_g1_i1	N	CBM20	CBM20	N	2	OLP81214.1 Calcium-dependent protein kinase 2, partial [Symbiodinium microadriaticum]	TRINITY_DN32841_c0_g1_i1	8.92673	-0.355354	0.0228114	0.721927	7553	5.79	5.04	5.2	4.75	5.31	4.86	2.22	5.32	4.08	2.95	4.03	4.01
TRINITY_DN32841_c0_g1_i2	N	CBM20	CBM20	N	2	OLP81214.1 Calcium-dependent protein kinase 2, partial [Symbiodinium microadriaticum]	TRINITY_DN32841_c0_g1_i2	1.86003	-1.04138	0.600453	1	88697	0	0.06	0	0.12	0	0	0	0	0	0.08	0	0
TRINITY_DN37663_c6_g3_i2	GH18(52-299)	GH18	N	N	2	OLQ03390.1 Chitotriosidase-1 [Symbiodinium microadriaticum]	TRINITY_DN37663_c6_g3_i2	-9.72278	0.169255	1	1	205459	0	0	0	0	0	0	0	0.08	0	0	0	0
TRINITY_DN37663_c6_g3_i5	GH18(52-376)	GH18	N	N	2	OLQ03390.1 Chitotriosidase-1 [Symbiodinium microadriaticum]	TRINITY_DN37663_c6_g3_i5	3.02482	-0.625327	0.605083	1	89800	0.21	0	0.09	0.13	0.1	0.15	0.02	0.1	0.08	0	0.14	0.04
TRINITY_DN37747_c2_g1_i2	CE13(30-200)	CE13	N	N	2	KAA0155976.1 hypothetical protein FNF29_01395 [Cafeteria roenbergensis]	TRINITY_DN37747_c2_g1_i2	1.53628	0.547135	0.882207	1	147072	0.32	0	0	0	0	0	0	0.29	0.41	0	0	0
TRINITY_DN37747_c2_g1_i4	CE13(30-297)	CE13	N	N	2	KAA0155976.1 hypothetical protein FNF29_01395 [Cafeteria roenbergensis]	TRINITY_DN37747_c2_g1_i4	1.48471	1.20839	0.57431	1	81241	0.05	0	0.05	0	0.09	0	0.04	0.05	0	0.04	0	0.14
TRINITY_DN38357_c4_g1_i1	GT66(14-673)	GT66	GT66	N	3	OLP85917.1 Dolichyl-diphosphooligosaccharide--protein glycosyltransferase subunit STT3 [Symbiodinium microadriaticum]	TRINITY_DN38357_c4_g1_i1	7.81846	0.0446579	0.839249	1	141480	1.61	1.2	1.16	1.17	1.61	1.16	0.76	1.44	1.25	1.01	1.26	1.38
TRINITY_DN38357_c4_g1_i6	GT66(145-652)	GT66	GT66	N	3	OLP85917.1 Dolichyl-diphosphooligosaccharide--protein glycosyltransferase subunit STT3 [Symbiodinium microadriaticum]	TRINITY_DN38357_c4_g1_i6	3.54714	0.674499	0.693924	1	101345	0	0.13	0	0.08	0	0.18	0.28	0.11	0.18	0.14	0	0
TRINITY_DN38357_c4_g1_i9	GT66(14-648)	GT66	GT66	N	3	OLP85917.1 Dolichyl-diphosphooligosaccharide--protein glycosyltransferase subunit STT3 [Symbiodinium microadriaticum]	TRINITY_DN38357_c4_g1_i9	-9.72278	-10.4875	0.127906	1	20685	0	0.1	0	0	0	0	0	0	0	0	0	0
TRINITY_DN38536_c3_g3_i4	AA6(2-189)	AA6	N	N	2	OLQ07621.1 Minor allergen Alt a 7 [Symbiodinium microadriaticum]	TRINITY_DN38536_c3_g3_i4	7.06723	0.50372	0.0636172	1	13101	1.5	1.59	1.28	0.91	1.66	1.44	0.67	1.7	1.72	1.67	1.42	2.08
TRINITY_DN40554_c2_g2_i2	GH7(20-458)	GH7+CBM1	GH7	Y(1-19)	3	OLQ05972.1 putative 1,4-beta-D-glucan cellobiohydrolase B [Symbiodinium microadriaticum]	TRINITY_DN40554_c2_g2_i2	7.68041	0.757028	0.0687293	1	13721	1.66	0.58	1.62	1.28	0.73	1.85	1.56	1.28	2	3.15	1.68	1.03
TRINITY_DN40554_c2_g2_i3	GH7(2-242)	GH7	N	N	2	OLQ05972.1 putative 1,4-beta-D-glucan cellobiohydrolase B [Symbiodinium microadriaticum]	TRINITY_DN40554_c2_g2_i3	1.49186	1.05581	0.380681	1	51333	0.04	0.04	0.02	0	0.13	0	0.08	0.07	0.02	0.09	0.04	0.04
TRINITY_DN40801_c4_g1_i1	GH47(292-716)	GH47	N	N	2	OLP79769.1 Mannosyl-oligosaccharide 1,2-alpha-mannosidase IA [Symbiodinium microadriaticum]	TRINITY_DN40801_c4_g1_i1	6.45675	-0.164892	0.593714	1	87649	0.63	0.8	0.58	0.64	0.95	0.78	0.34	0.4	0.49	0.48	0.75	0.48
TRINITY_DN40801_c4_g1_i10	GH47(172-596)	GH47	N	N	2	OLP79769.1 Mannosyl-oligosaccharide 1,2-alpha-mannosidase IA [Symbiodinium microadriaticum]	TRINITY_DN40801_c4_g1_i10	2.9516	-2.56837	0.109118	1	18384	0.11	0	0.35	0.18	0	0	0.5	0.27	0	0.09	0	0
TRINITY_DN40801_c4_g1_i13	GH47(172-596)	GH47	N	N	2	OLP79769.1 Mannosyl-oligosaccharide 1,2-alpha-mannosidase IA [Symbiodinium microadriaticum]	TRINITY_DN40801_c4_g1_i13	3.1966	1.08605	0.516032	1	70805	0.13	0.09	0	0	0	0	0	0	0.24	0	0	0.19
TRINITY_DN40801_c4_g1_i14	GH47(172-596)	GH47	N	N	2	OLP79769.1 Mannosyl-oligosaccharide 1,2-alpha-mannosidase IA [Symbiodinium microadriaticum]	TRINITY_DN40801_c4_g1_i14	1.8437	-0.791558	0.73112	1	106865	0	0.05	0.09	0	0.04	0	0.07	0.08	0.08	0	0	0
TRINITY_DN40801_c4_g1_i5	GH47(123-547)	GH47	N	N	2	OLP79769.1 Mannosyl-oligosaccharide 1,2-alpha-mannosidase IA [Symbiodinium microadriaticum]	TRINITY_DN40801_c4_g1_i5	-9.72278	-10.4466	0.125945	1	20434	0	0	0.13	0	0.12	0	0	0.14	0	0	0	0
TRINITY_DN40801_c4_g1_i6	GH47(172-596)	GH47	N	N	2	OLP79769.1 Mannosyl-oligosaccharide 1,2-alpha-mannosidase IA [Symbiodinium microadriaticum]	TRINITY_DN40801_c4_g1_i6	1.86442	-0.775046	0.770355	1	123356	0.17	0	0	0	0	0.28	0	0.11	0	0	0	0.08
